# Supplementary material for: DNA Binding and Anticancer Properties of New Pd(II)-Phosphorus Schiff Base Metal Complexes
Source: MDPI journal article supplement (doi:10.3390/pharmaceutics14112409), 2022-11-08
Supplement: s1 [file s1]

## SUPPLEMENTARY DATA

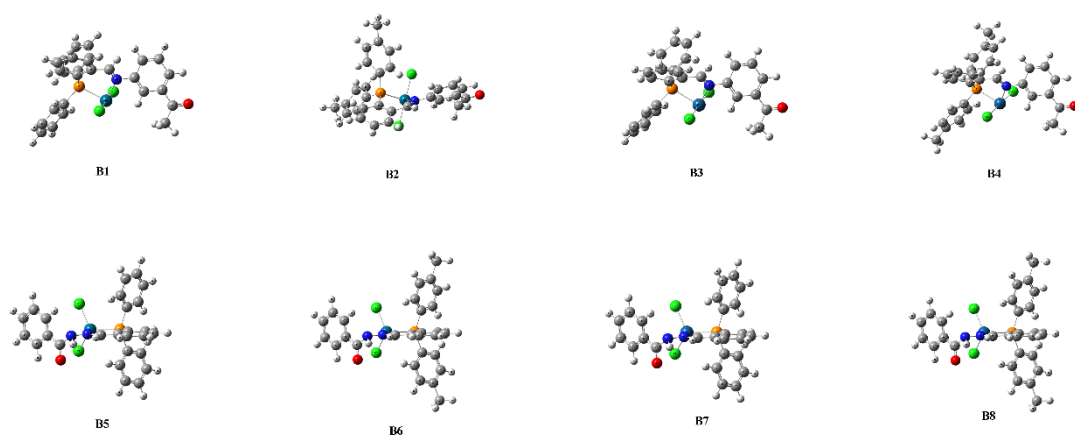

**Figure S1.** 3D structures of the optimized **B1-B8** complexes, respectively.

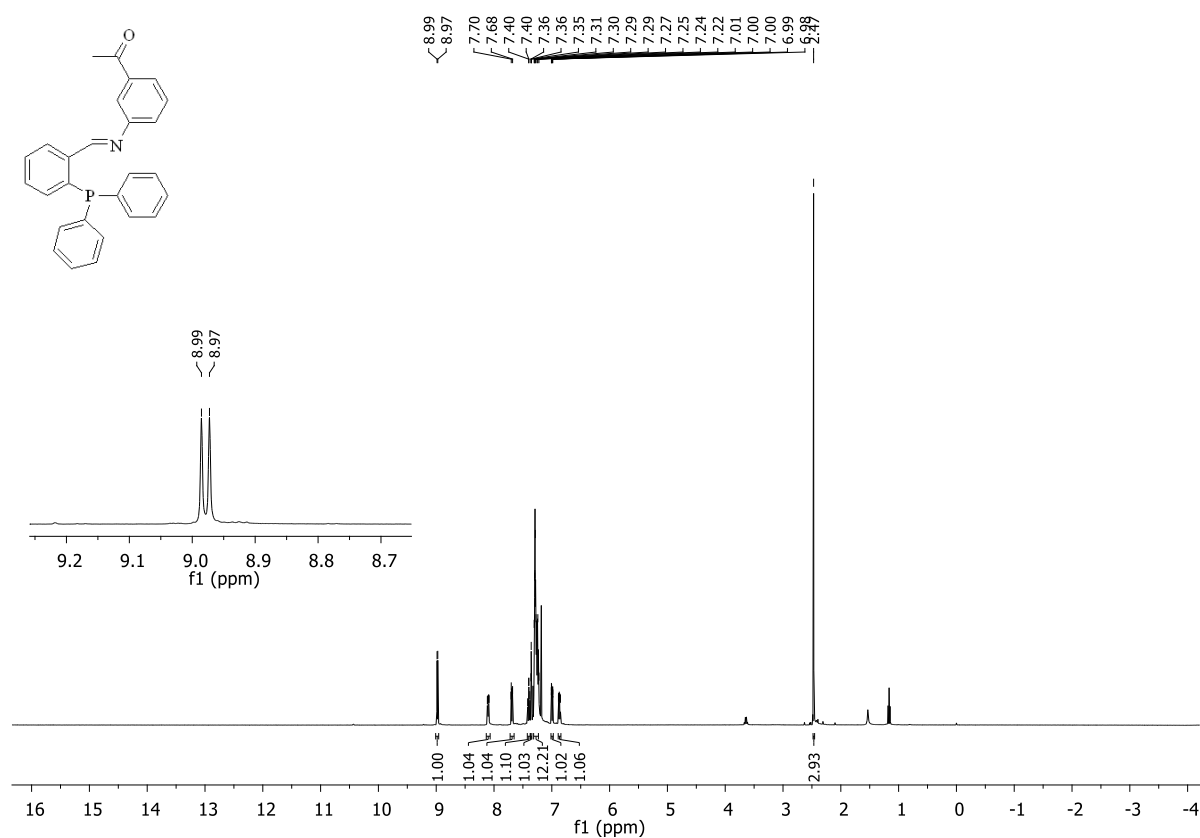

**Figure S2.**  $^1\text{H}$  NMR spectra of compound **L1**

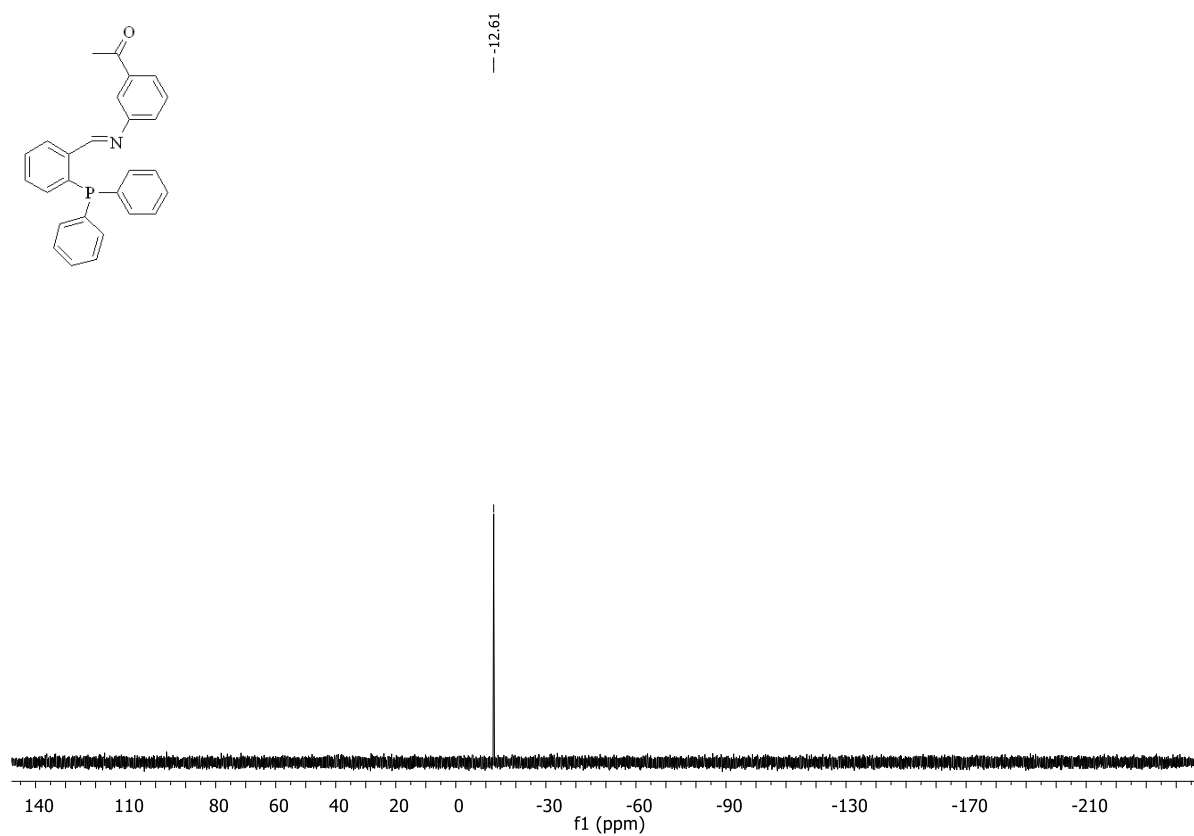

**Figure S3.**  $^{31}\text{P}$  NMR spectra of compound L1

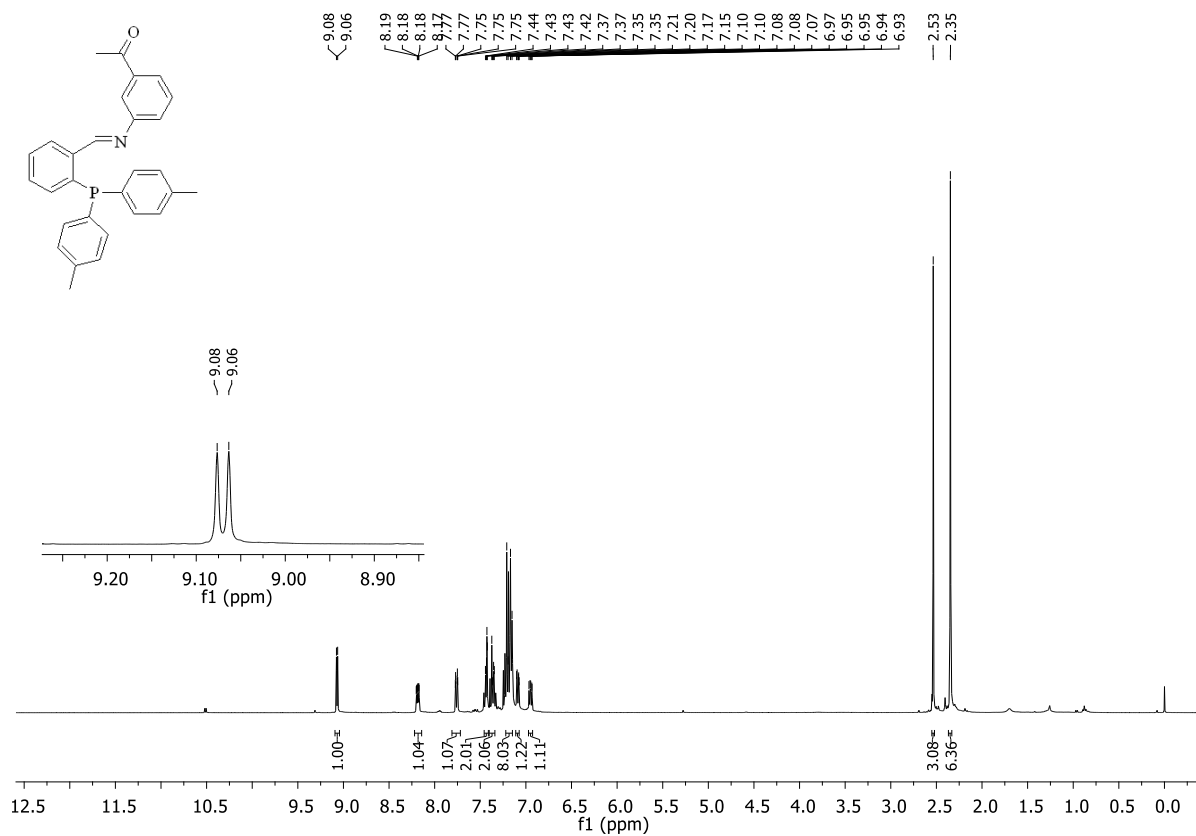

**Figure S4.**  $^1\text{H}$  NMR spectra of compound L2

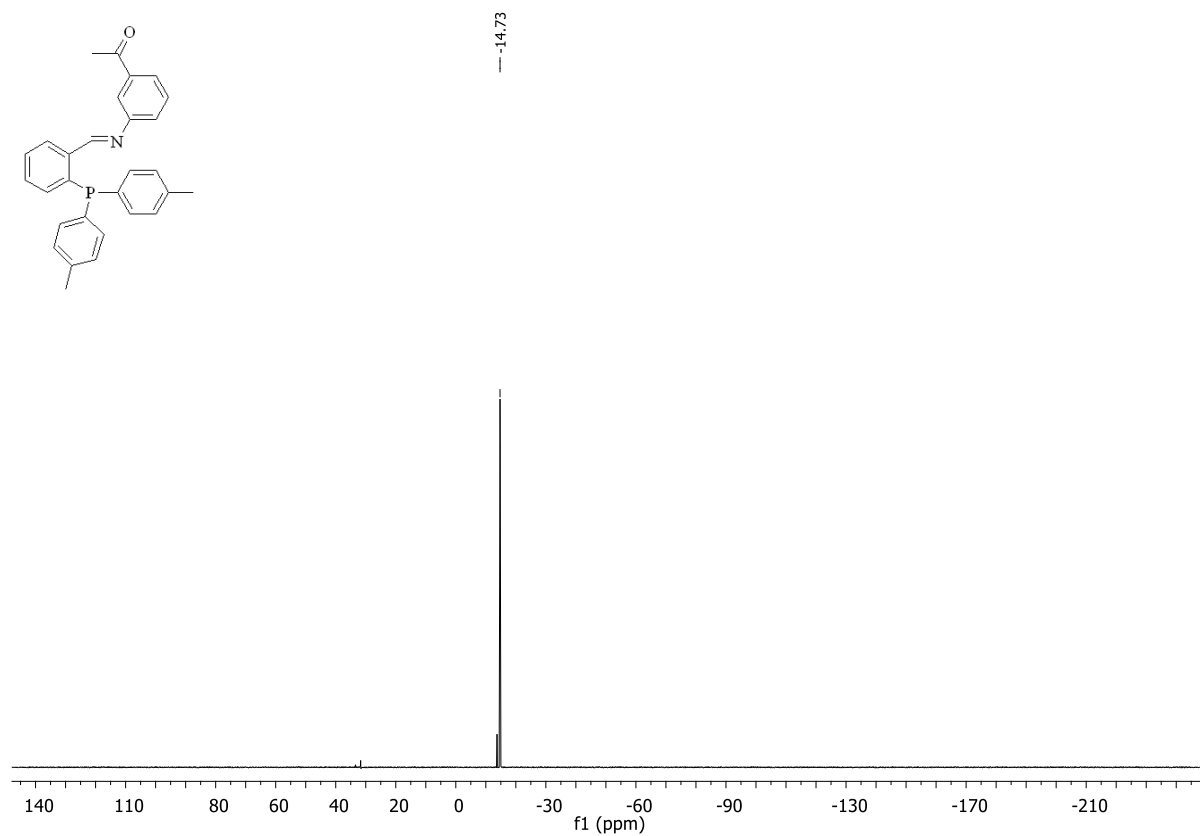

**Figure S5.**  $^{31}\text{P}$  NMR spectra of compound L2

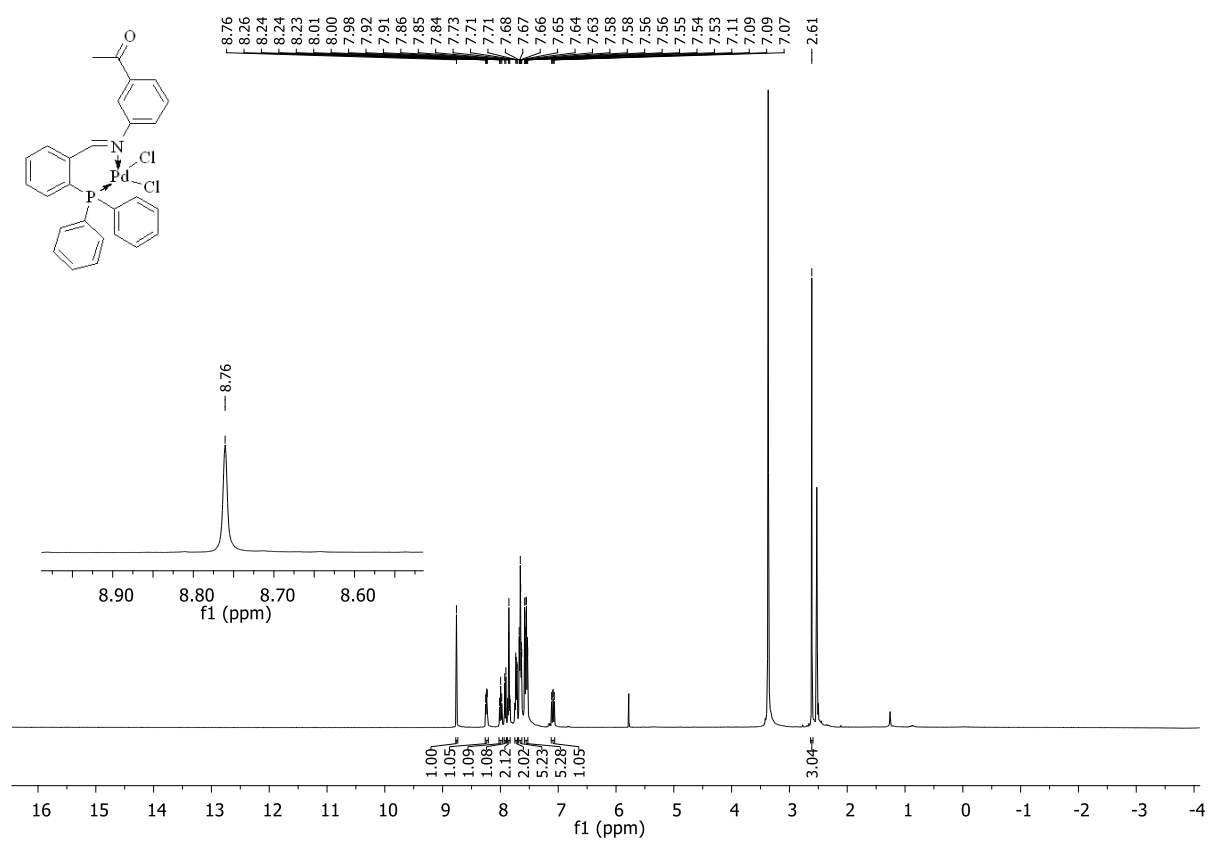

**Figure S6.**  $^1\text{H}$  NMR spectra of compound B1

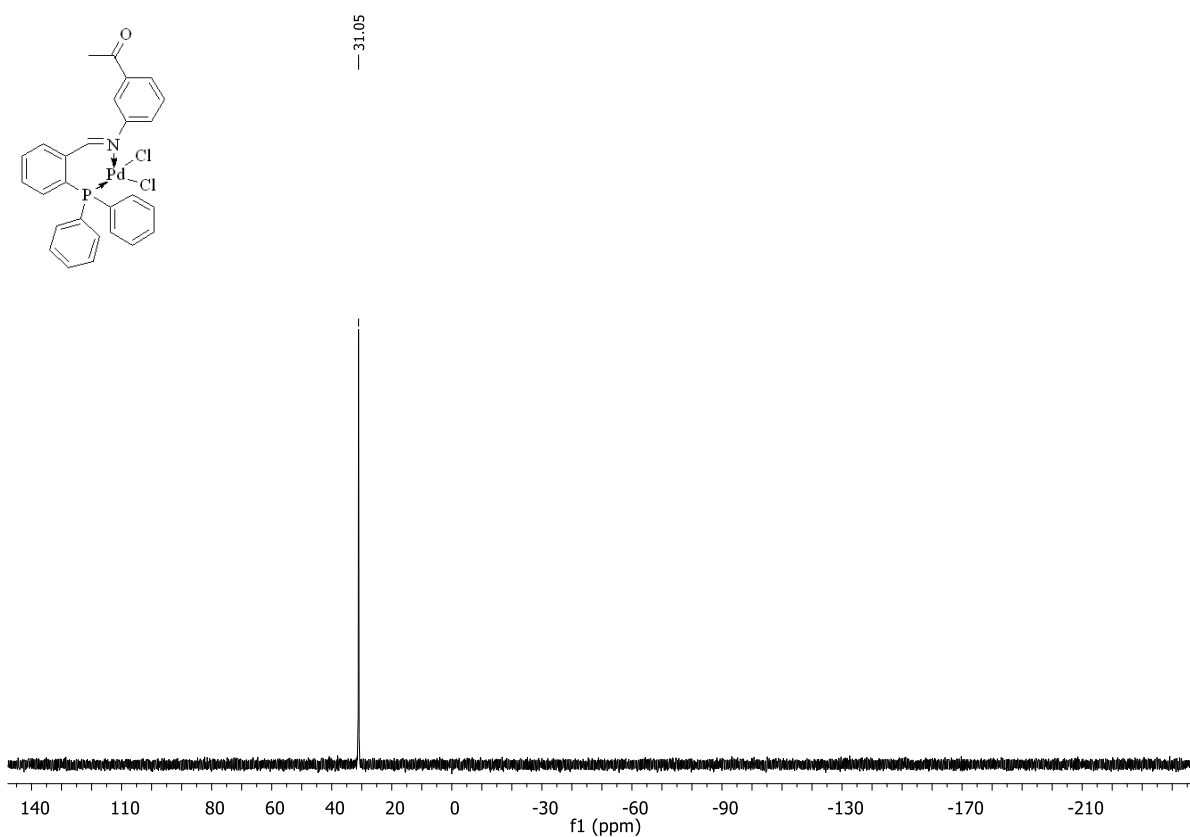

**Figure S7.** <sup>31</sup>P NMR spectra of compound B1

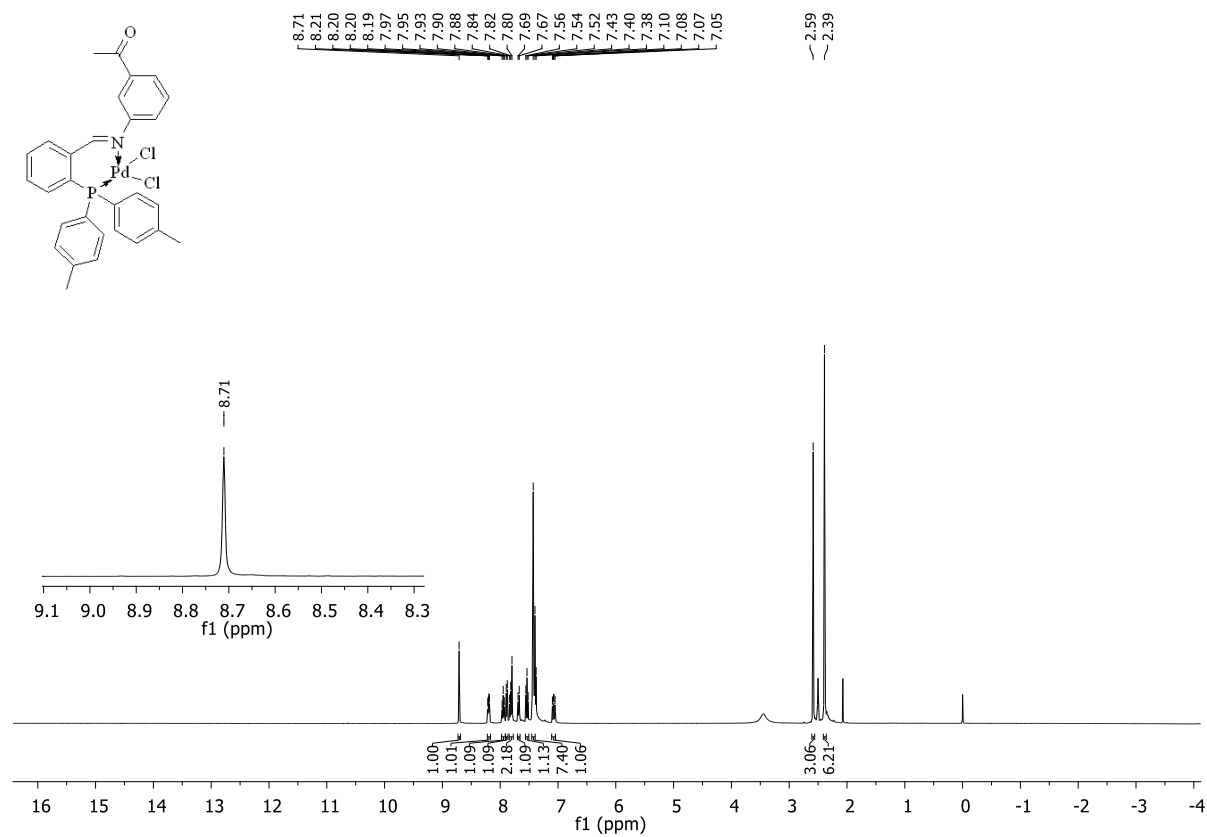

**Figure S8.** <sup>1</sup>H NMR spectra of compound B2

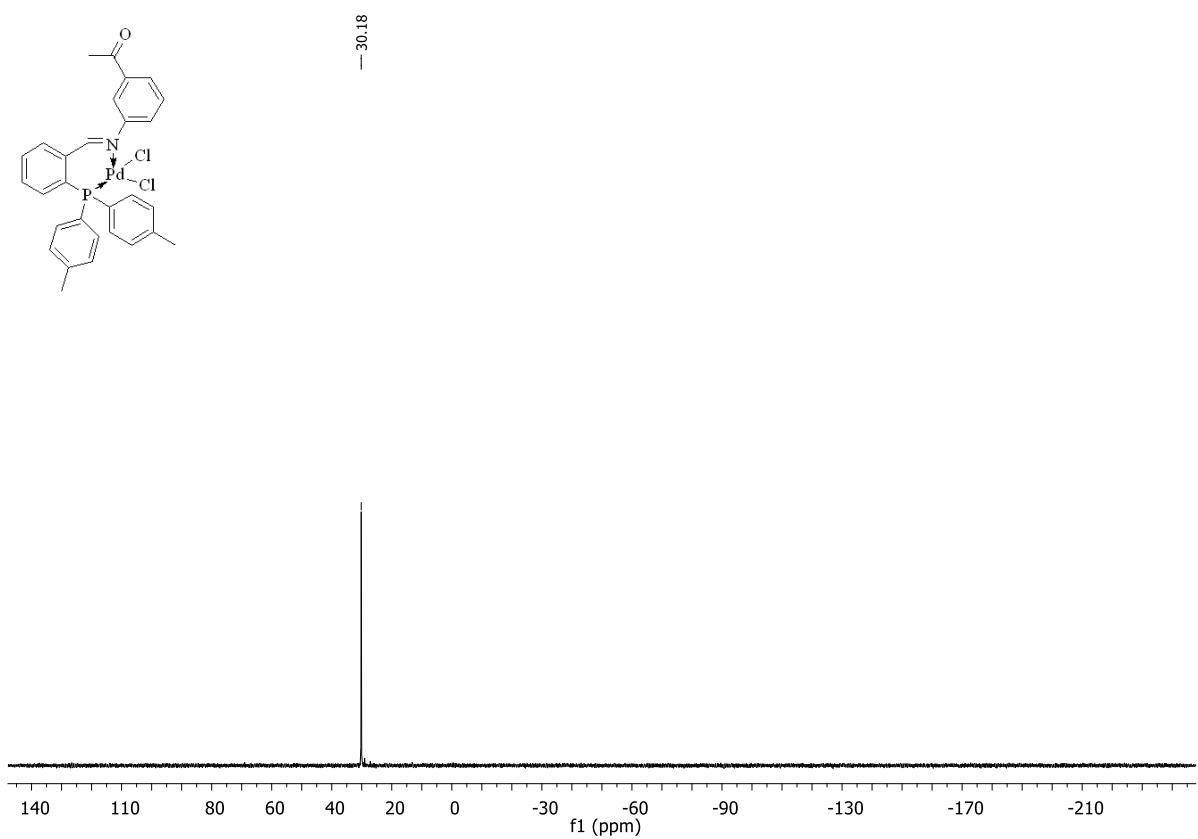

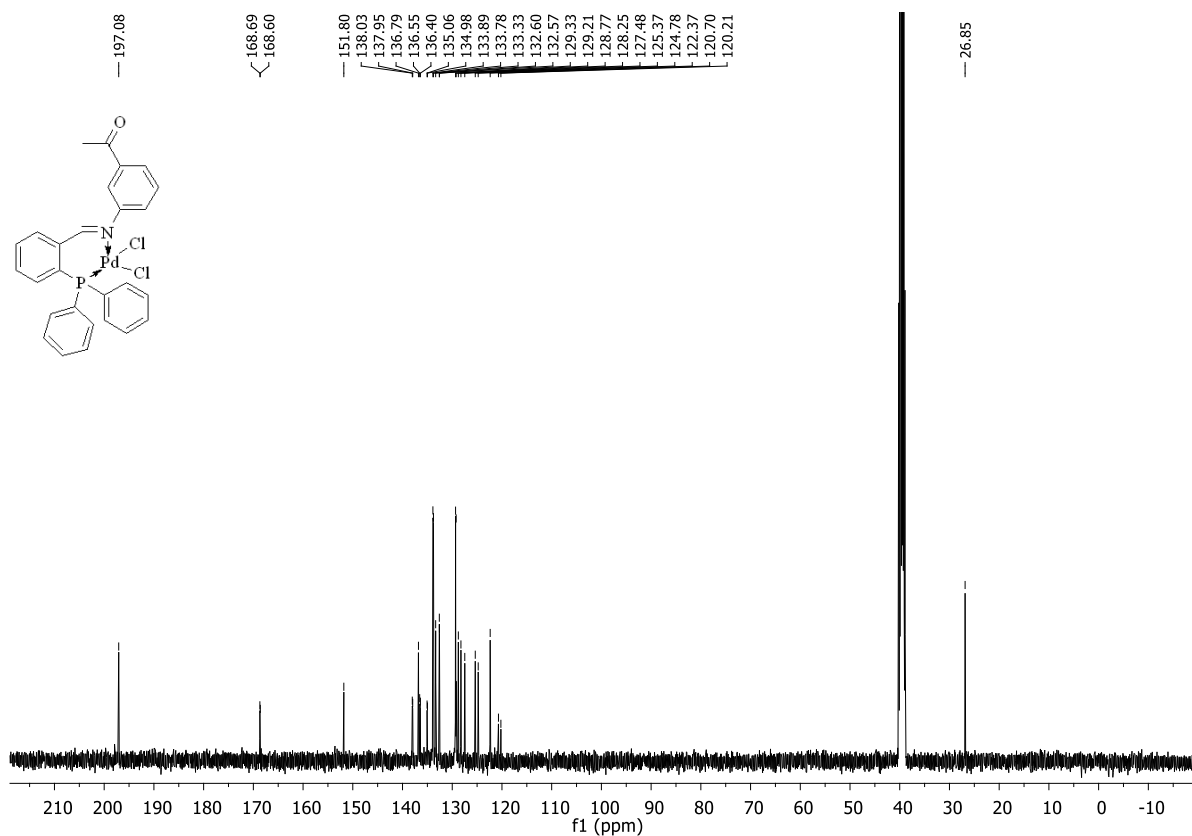

Figure S10. <sup>13</sup>C NMR spectra of compound B1

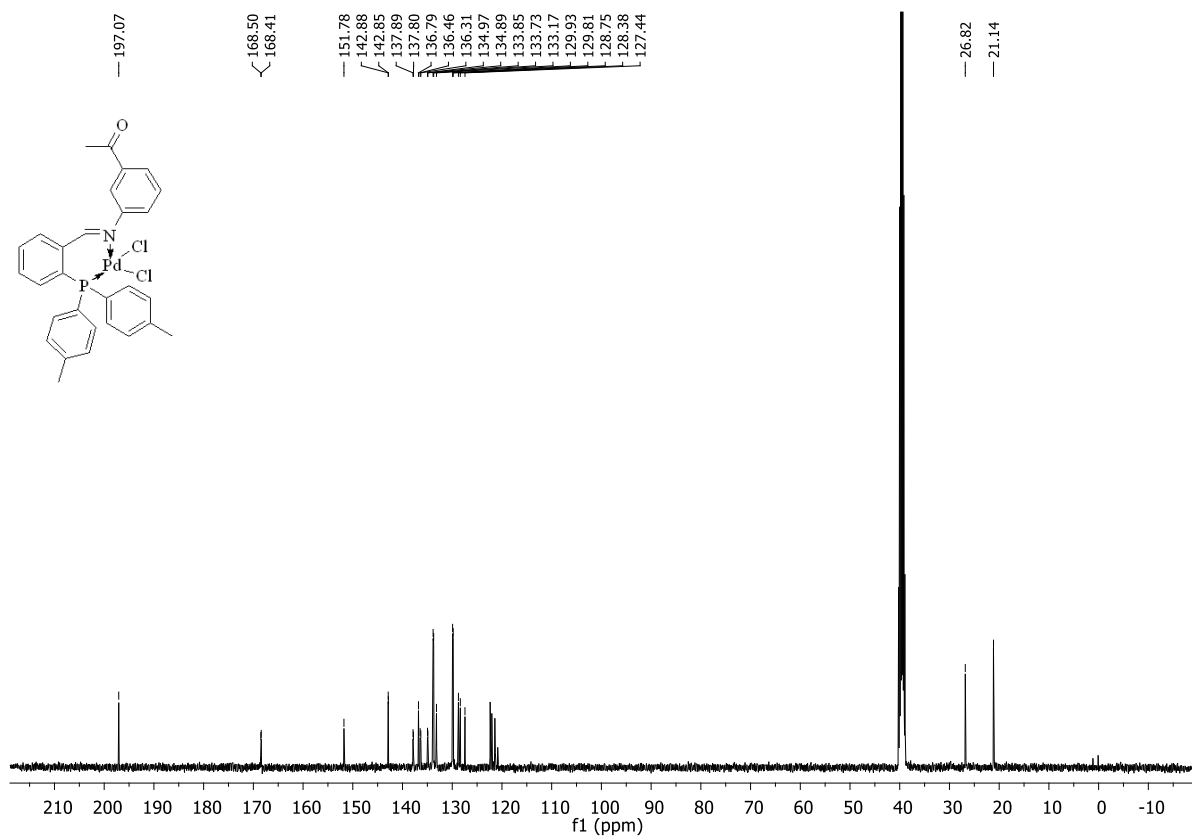

Figure S11. <sup>13</sup>C NMR spectra of compound B2

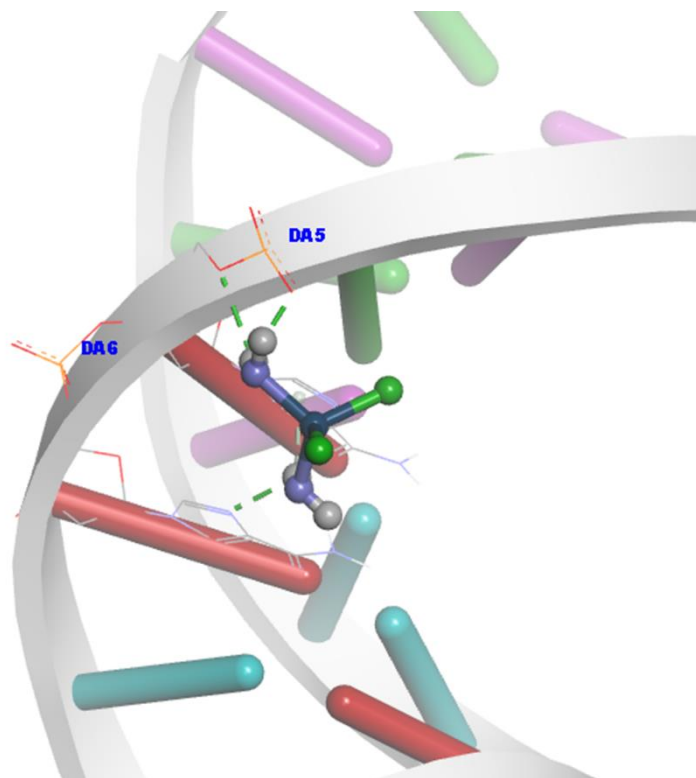

**Figure S12.** Docking conformation and interactions of cisplatin with DNA.

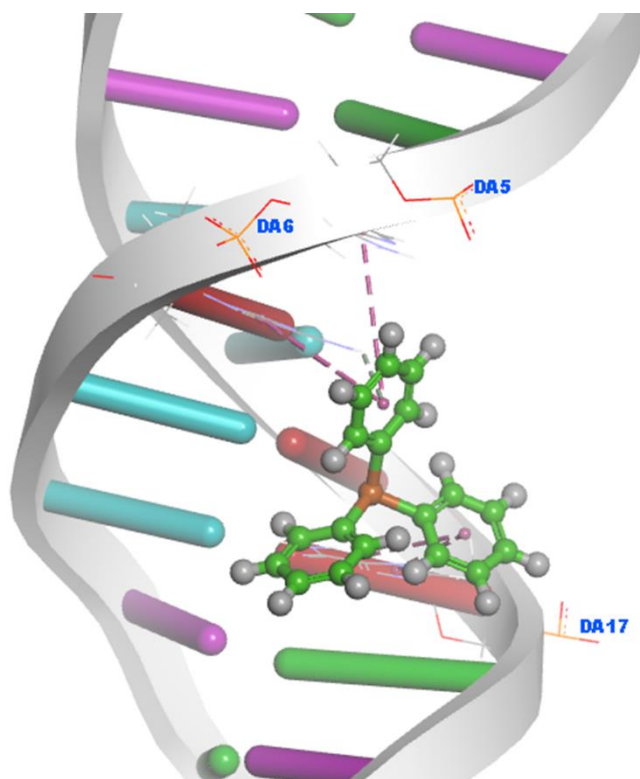

**Figure S13.** Docking conformation and interactions of triphenylphosphine with DNA.

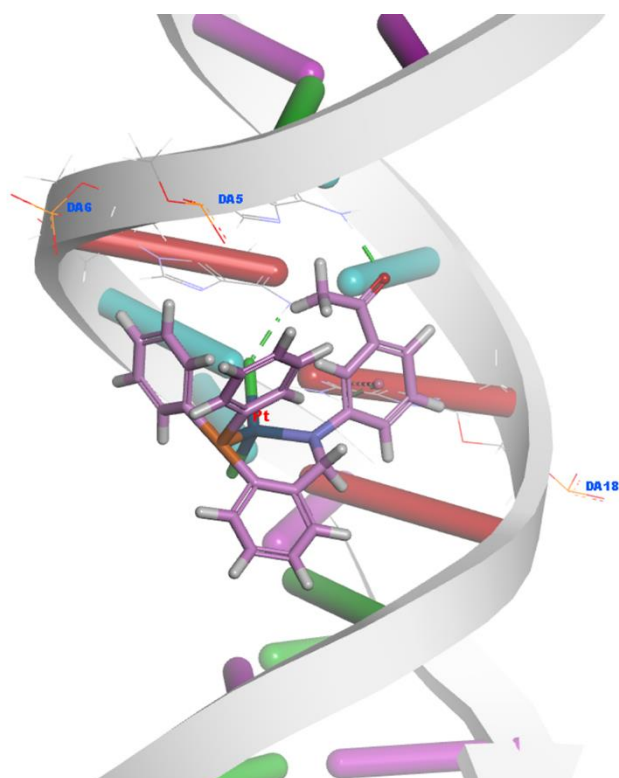

**Figure S14.** Docking conformation and interactions of the **B3** complex with DNA.



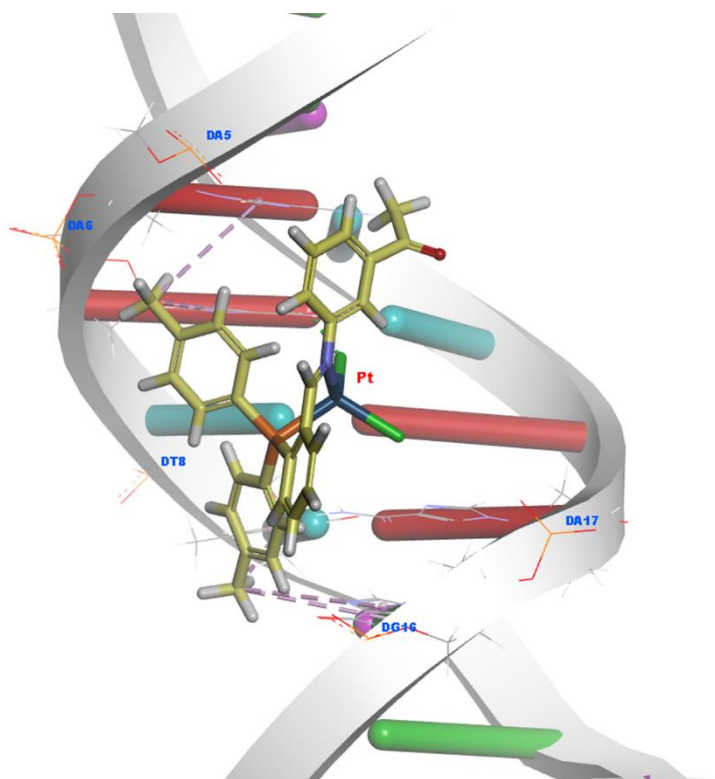

**Figure S15.** Docking conformation and interactions of the **B4** complex with DNA.

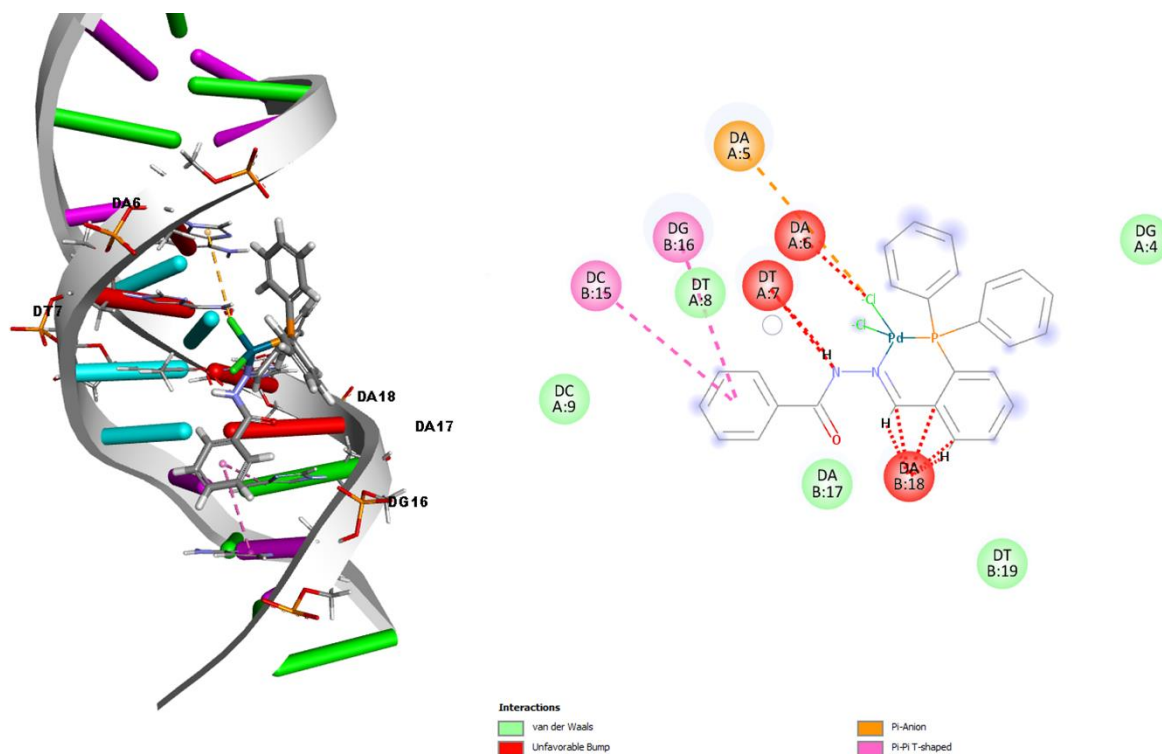

**Figure S16.** 3D and 2D docking interactions of the compound B5 with DNA.

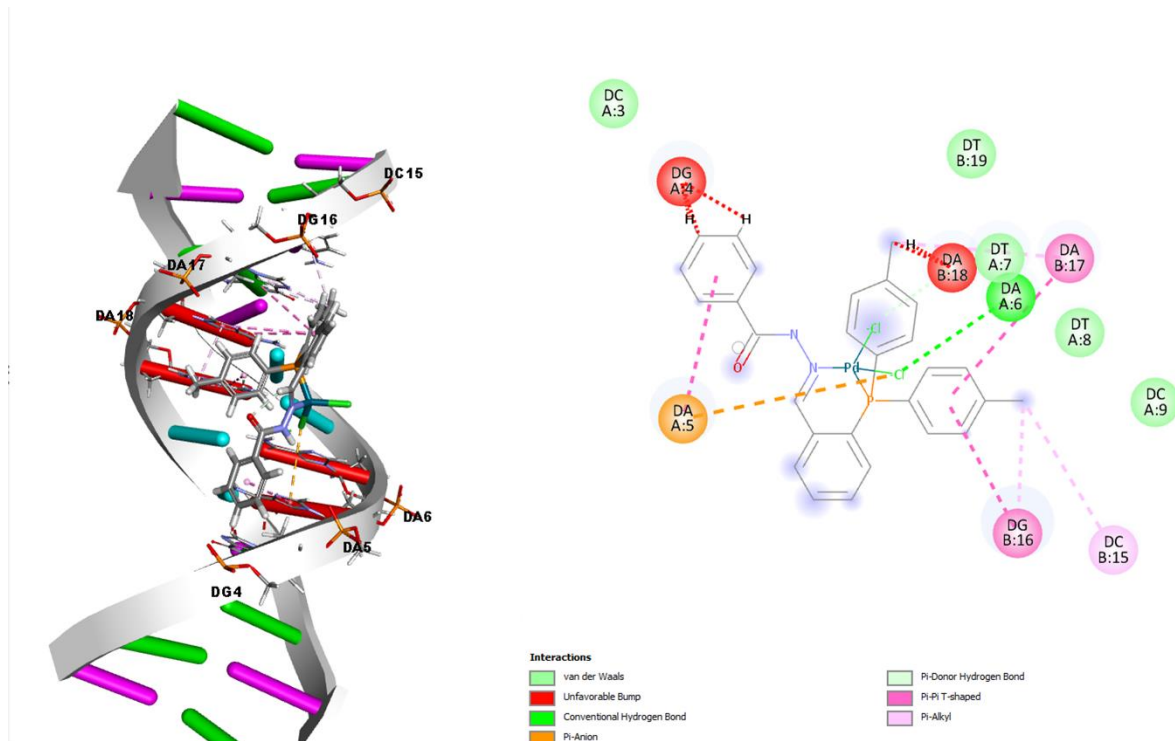

**Figure S17.** 3D and 2D docking interactions of the compound B6 with DNA.



**Table S1.** Interactions types and distances of the standard compounds (cisplatin: std-1 and triphenylphosphine: std-2) and the compound B1-B8 with DNA, respectively.

| <b>DNA Interactions-std1</b> | <b>Distance Å</b> | <b>Bonding</b> | <b>Bonding Types</b>       | <b>Binding site of target</b> | <b>Binding site of ligand</b> |
|------------------------------|-------------------|----------------|----------------------------|-------------------------------|-------------------------------|
| :std1:H6 - A:DA5:O5'         | 2.6394            | Hydrogen Bond  | Conventional Hydrogen Bond | A:DA5:O5'                     | std1:H6                       |
| std1:H7 - A:DA5:OP2          | 1.6408            | Hydrogen Bond  | Conventional Hydrogen Bond | A:DA5:OP2                     | std1:H7                       |
| std1:H9 - A:DA6:N7           | 2.2295            | Hydrogen Bond  | Conventional Hydrogen Bond | A:DA6:N7                      | std1:H9                       |
| std1:H9 - A:DA5              | 2.7973            | Hydrogen Bond  | Pi-Donor Hydrogen Bond     | A:DA5                         | std1:H9                       |
| <b>DNA Interactions-std2</b> | <b>Distance Å</b> | <b>Bonding</b> | <b>Bonding Types</b>       | <b>Binding site of target</b> | <b>Binding site of ligand</b> |
| A:DA6:H61 - :std2            | 2.9341            | Hydrogen Bond  | Pi-Donor Hydrogen Bond     | A:DA6:H61                     | std2                          |
| A:DA5 - :std2                | 5.4885            | Hydrophobic    | Pi-Pi T-shaped             | A:DA5                         | std2                          |
| A:DA6 - :std2                | 4.7080            | Hydrophobic    | Pi-Pi T-shaped             | A:DA6                         | std2                          |
| A:DA6 - :std2                | 5.5637            | Hydrophobic    | Pi-Pi T-shaped             | A:DA6                         | std2                          |
| B:DA17 - :std2               | 4.3983            | Hydrophobic    | Pi-Pi T-shaped             | B:DA17                        | std2                          |
| B:DA17 - :std2               | 5.8602            | Hydrophobic    | Pi-Pi T-shaped             | B:DA17                        | std2                          |
| <b>DNA Interactions-B1</b>   | <b>Distance Å</b> | <b>Bonding</b> | <b>Bonding Types</b>       | <b>Binding site of target</b> | <b>Binding site of ligand</b> |
| A:DA6:H62 - :B1:O29          | 2.5790            | Hydrogen Bond  | Conventional Hydrogen Bond | A:DA6:H62                     | :B1:O29                       |
| B:DA18:H61 - :B1:O29         | 2.3822            | Hydrogen Bond  | Conventional Hydrogen Bond | B:DA18:H61                    | :B1:O29                       |
| B:DA17 - :B1                 | 4.2083            | Hydrophobic    | Pi-Pi T-shaped             | B:DA17                        | :B1                           |
| <b>DNA Interactions-B2</b>   | <b>Distance Å</b> | <b>Bonding</b> | <b>Bonding Types</b>       | <b>Binding site of target</b> | <b>Binding site of ligand</b> |
| B2:H5 - B:DA17:N7            | 1.6079            | Hydrogen Bond  | Carbon Hydrogen Bond       | B:DA17:N7                     | B2:H5                         |
| A:DA5 - B2                   | 4.5858            | Hydrophobic    | Pi-Pi Stacked              | A:DA5                         | B2                            |
| A:DA5 - B2                   | 5.4257            | Hydrophobic    | Pi-Pi T-shaped             | A:DA5                         | B2                            |
| A:DT7 - B2                   | 5.6535            | Hydrophobic    | Pi-Pi T-shaped             | A:DT7                         | B2                            |
| B:DA17 - B2                  | 4.5750            | Hydrophobic    | Pi-Pi T-shaped             | B:DA17                        | B2                            |
| A:DG4 - B2:C35               | 4.8698            | Hydrophobic    | Pi-Alkyl                   | A:DG4                         | B2:C35                        |

|                            |                   |                       |                                                                 |                               |                               |
|----------------------------|-------------------|-----------------------|-----------------------------------------------------------------|-------------------------------|-------------------------------|
| A:DA5 - B2:C34             | 5.1792            | Hydrophobic           | Pi-Alkyl                                                        | A:DA5                         | B2:C34                        |
| <b>DNA Interactions-B3</b> | <b>Distance Å</b> | <b>Bonding</b>        | <b>Bonding Types</b>                                            | <b>Binding site of target</b> | <b>Binding site of ligand</b> |
| A:DA5:H61 - B3:O29         | 1.9702            | Hydrogen Bond         | Conventional Hydrogen Bond                                      | A:DA5:H61                     | B3:O29                        |
| A:DA6:H61 - B3:CL30        | 2.0322            | Hydrogen Bond;Halogen | Conventional Hydrogen Bond;Halogen (Cl, Br, I)                  | A:DA6:H61                     | B3:CL30                       |
| B:DA18:H61 - B3            | 2.2287            | Hydrogen Bond         | Pi-Donor Hydrogen Bond                                          | B:DA18:H61                    | B3                            |
| B:DA18 - B3                | 5.1754            | Hydrophobic           | Pi-Pi T-shaped                                                  | B:DA18                        | B3                            |
| <b>DNA Interactions-B4</b> | <b>Distance Å</b> | <b>Bonding</b>        | <b>Bonding Types</b>                                            | <b>Binding site of target</b> | <b>Binding site of ligand</b> |
| A:DA6:H61 -B4:CL30         | 2.0434            | Hydrogen Bond;Halogen | Conventional Hydrogen Bond;Halogen (Cl, Br, I)                  | A:DA6:H61                     | B4:CL30                       |
| A:DA5 -B4:C35              | 4.9879            | Hydrophobic           | Pi-Alkyl                                                        | A:DA5                         | B4:C35                        |
| A:DA6 -B4:C35              | 4.1503            | Hydrophobic           | Pi-Alkyl                                                        | A:DA6                         | B4:C35                        |
| A:DT8 -B4:C34              | 5.1468            | Hydrophobic           | Pi-Alkyl                                                        | A:DT8                         | B4:C34                        |
| B:DG16 -B4:C34             | 5.1358            | Hydrophobic           | Pi-Alkyl                                                        | B:DG16                        | B4:C34                        |
| B:DG16 -B4:C34             | 5.2304            | Hydrophobic           | Pi-Alkyl                                                        | B:DG16                        | B4:C34                        |
| <b>DNA Interactions-B5</b> | <b>Distance Å</b> | <b>Bonding</b>        | <b>Bonding Types</b>                                            | <b>Binding site of target</b> | <b>Binding site of ligand</b> |
| :B5:CL33 - A:DA5           | 4.7311            | Electrostatic         | Pi-Anion                                                        | :B5:CL33                      | A:DA5                         |
| B:DC15 - :B5               | 5.2471            | Hydrophobic           | Pi-Pi T-shaped                                                  | B:DC15                        | :B5                           |
| B:DG16 - :B5               | 5.2013            | Hydrophobic           | Pi-Pi T-shaped                                                  | B:DG16                        | :B5                           |
| A:DA6:N6 - :B5:CL33        | 2.1650            | Unfavorable           | Unfavorable Bump                                                | A:DA6:N6                      | :B5:CL33                      |
| A:DA6:H61 - :B5:CL33       | 1.3547            | Unfavorable           | Unfavorable Bump;Conventional Hydrogen Bond;Halogen (Cl, Br, I) | A:DA6:H61                     | :B5:CL33                      |
| A:DT7:O4 - :B5:N8          | 2.1142            | Unfavorable           | Unfavorable Bump                                                | A:DT7:O4                      | :B5:N8                        |
| B:DA18:N7 - :B5:H8         | 1.4712            | Unfavorable           | Unfavorable Bump                                                | B:DA18:N7                     | :B5:H8                        |
| B:DA18:N6 - :B5:C11        | 1.6515            | Unfavorable           | Unfavorable Bump                                                | B:DA18:N6                     | :B5:C11                       |
| B:DA18:N6 - :B5:C12        | 1.9633            | Unfavorable           | Unfavorable Bump                                                | B:DA18:N6                     | :B5:C12                       |

|                            |                   |                       |                                                |                               |                               |
|----------------------------|-------------------|-----------------------|------------------------------------------------|-------------------------------|-------------------------------|
| B:DA18:N6 - :B5:C17        | 2.1790            | Unfavorable           | Unfavorable Bump                               | B:DA18:N6                     | :B5:C17                       |
| B:DA18:N6 - :B5:H7         | 1.7185            | Unfavorable           | Unfavorable Bump                               | B:DA18:N6                     | :B5:H7                        |
| B:DA18:H61 - :B5:C11       | 1.5162            | Unfavorable           | Unfavorable Bump                               | B:DA18:H61                    | :B5:C11                       |
| B:DA18:H61 - :B5:C12       | 1.0206            | Unfavorable           | Unfavorable Bump                               | B:DA18:H61                    | :B5:C12                       |
| B:DA18:H61 - :B5:C17       | 1.2181            | Unfavorable           | Unfavorable Bump                               | B:DA18:H61                    | :B5:C17                       |
| B:DA18:H61 - :B5:H8        | 1.4681            | Unfavorable           | Unfavorable Bump                               | B:DA18:H61                    | :B5:H8                        |
| B:DA18:H62 - :B5:C11       | 1.6637            | Unfavorable           | Unfavorable Bump                               | B:DA18:H62                    | :B5:C11                       |
| :B5:H6 - A:DT7:O4          | 1.4794            | Unfavorable           | Unfavorable Bump;Conventional Hydrogen Bond    | :B5:H6                        | A:DT7:O4                      |
| <b>DNA Interactions-B6</b> | <b>Distance Å</b> | <b>Bonding</b>        | <b>Bonding Types</b>                           | <b>Binding site of target</b> | <b>Binding site of ligand</b> |
| A:DA6:H61 - :B6:CL33       | 1.9407            | Hydrogen Bond;Halogen | Conventional Hydrogen Bond;Halogen (Cl, Br, I) | A:DA6:H61                     | :B6:CL33                      |
| :B6:H7 - :B6:O10           | 2.2210            | Hydrogen Bond         | Carbon Hydrogen Bond                           | :B6:H7                        | :B6:O10                       |
| :B6:CL33 - A:DA5           | 4.6273            | Electrostatic         | Pi-Anion                                       | A:DA5                         | :B6:CL33                      |
| B:DA18:H61 - :B6           | 1.7053            | Hydrogen Bond         | Pi-Donor Hydrogen Bond                         | B:DA18:H61                    | :B6                           |
| A:DA5 - :B6                | 4.8547            | Hydrophobic           | Pi-Pi T-shaped                                 | A:DA5                         | :B6                           |
| B:DG16 - :B6               | 5.1974            | Hydrophobic           | Pi-Pi T-shaped                                 | B:DG16                        | :B6                           |
| B:DA17 - :B6               | 5.7331            | Hydrophobic           | Pi-Pi T-shaped                                 | B:DA17                        | :B6                           |
| B:DA17 - :B6               | 5.6734            | Hydrophobic           | Pi-Pi T-shaped                                 | B:DA17                        | :B6                           |
| B:DA18 - :B6               | 4.9981            | Hydrophobic           | Pi-Pi T-shaped                                 | B:DA18                        | :B6                           |
| B:DC15 - :B6:C35           | 4.4823            | Hydrophobic           | Pi-Alkyl                                       | B:DC15                        | :B6:C35                       |
| B:DG16 - :B6:C35           | 4.4751            | Hydrophobic           | Pi-Alkyl                                       | B:DG16                        | :B6:C35                       |
| B:DG16 - :B6:C35           | 4.8113            | Hydrophobic           | Pi-Alkyl                                       | B:DG16                        | :B6:C35                       |
| B:DA17 - :B6:C34           | 4.3797            | Hydrophobic           | Pi-Alkyl                                       | B:DA17                        | :B6:C34                       |
| B:DA18 - :B6:C34           | 4.7311            | Hydrophobic           | Pi-Alkyl                                       | B:DA18                        | :B6:C34                       |
| A:DG4:C8 - :B6:H2          | 1.6618            | Unfavorable           | Unfavorable Bump                               | A:DG4:C8                      | :B6:H2                        |

|                            |                   |                    |                            |                               |                               |
|----------------------------|-------------------|--------------------|----------------------------|-------------------------------|-------------------------------|
| A:DG4:H2'1 - :B6:H1        | 1.3727            | Unfavorable        | Unfavorable Bump           | A:DG4:H2'1                    | :B6:H1                        |
| A:DG4:H8 - :B6:C2          | 1.6612            | Unfavorable        | Unfavorable Bump           | A:DG4:H8                      | :B6:C2                        |
| A:DG4:H8 - :B6:H2          | 0.6467            | Unfavorable        | Unfavorable Bump           | A:DG4:H8                      | :B6:H2                        |
| B:DA18:N7 - :B6:C34        | 2.2334            | Unfavorable        | Unfavorable Bump           | B:DA18:N7                     | :B6:C34                       |
| B:DA18:N7 - :B6:H24        | 1.7305            | Unfavorable        | Unfavorable Bump           | B:DA18:N7                     | :B6:H24                       |
| <b>DNA Interactions-B7</b> | <b>Distance Å</b> | <b>Bonding</b>     | <b>Bonding Types</b>       | <b>Binding site of target</b> | <b>Binding site of ligand</b> |
| B:DA18:H62 - B7::O10       | 3.0998            | Hydrogen Bond      | Conventional Hydrogen Bond | B:DA18:H62                    | B7::O10                       |
| B7::H7 - B:DA17:N7         | 2.7335            | Hydrogen Bond      | Carbon Hydrogen Bond       | B7::H7                        | B:DA17:N7                     |
| B7::H7 - B7::O10           | 2.2638            | Hydrogen Bond      | Carbon Hydrogen Bond       | B7::H7                        | B7::O10                       |
| B:DA18:H61 - B7:           | 2.4236            | Hydrogen Bond      | Pi-Donor Hydrogen Bond     | B:DA18:H61                    | B7:                           |
| A:DA6:N7 - B7:             | 2.6399            | Other              | Pi-Lone Pair               | A:DA6:N7                      | B7:                           |
| B:DG16:N7 - B7:            | 2.7502            | Other              | Pi-Lone Pair               | B:DG16:N7                     | B7:                           |
| A:DA5 - B7:                | 5.0104            | Hydrophobic        | Pi-Pi T-shaped             | A:DA5                         | B7:                           |
| A:DA6 - B7:                | 5.0897            | Hydrophobic        | Pi-Pi T-shaped             | A:DA6                         | B7:                           |
| B:DC15 - B7:               | 4.9911            | Hydrophobic        | Pi-Pi T-shaped             | B:DC15                        | B7:                           |
| B:DG16 - B7:               | 3.9387            | Hydrophobic        | Pi-Pi T-shaped             | B:DG16                        | B7:                           |
| B:DG16 - B7:               | 4.9909            | Hydrophobic        | Pi-Pi T-shaped             | B:DG16                        | B7:                           |
| <b>B:DA17:H61 - B7:O10</b> | <b>1.5283</b>     | <b>Unfavorable</b> | <b>Unfavorable Bump</b>    | <b>B:DA17:H61</b>             | <b>B7:O10</b>                 |
| <b>DNA Interactions-B8</b> | <b>Distance Å</b> | <b>Bonding</b>     | <b>Bonding Types</b>       | <b>Binding site of target</b> | <b>Binding site of ligand</b> |
| :B8:H7 - :B8:O10           | 2.1993            | Hydrogen Bond      | Carbon Hydrogen Bond       | :B8:H7                        | :B8:O10                       |
| B:DG16 - :B8               | 4.7999            | Hydrophobic        | Pi-Pi T-shaped             | B:DG16                        | :B8                           |
| B:DA17 - :B8               | 5.6722            | Hydrophobic        | Pi-Pi T-shaped             | B:DA17                        | :B8                           |
| B:DC15 - :B8:C34           | 3.7848            | Hydrophobic        | Pi-Alkyl                   | B:DC15                        | :B8:C34                       |
| B:DG16 - :B8:C34           | 4.1940            | Hydrophobic        | Pi-Alkyl                   | B:DG16                        | :B8:C34                       |
| B:DG16 - :B8:C34           | 4.7479            | Hydrophobic        | Pi-Alkyl                   | B:DG16                        | :B8:C34                       |



|                      |        |             |                                                                 |            |          |
|----------------------|--------|-------------|-----------------------------------------------------------------|------------|----------|
| B:DA17 - :B8:C33     | 3.3116 | Hydrophobic | Pi-Alkyl                                                        | B:DA17     | :B8:C33  |
| B:DA17 - :B8:C33     | 4.7411 | Hydrophobic | Pi-Alkyl                                                        | B:DA17     | :B8:C33  |
| B:DA18 - :B8:C33     | 4.8834 | Hydrophobic | Pi-Alkyl                                                        | B:DA18     | :B8:C33  |
| A:DG4:C8 - :B8:H2    | 1.6368 | Unfavorable | Unfavorable Bump                                                | A:DG4:C8   | :B8:H2   |
| A:DG4:H8 - :B8:C2    | 1.7474 | Unfavorable | Unfavorable Bump                                                | A:DG4:H8   | :B8:C2   |
| A:DG4:H8 - :B8:H2    | 0.6903 | Unfavorable | Unfavorable Bump                                                | A:DG4:H8   | :B8:H2   |
| A:DA6:H61 - :B8:CL32 | 1.7167 | Unfavorable | Unfavorable Bump;Conventional Hydrogen Bond;Halogen (Cl, Br, I) | A:DA6:H61  | :B8:CL32 |
| B:DG16:N7 - :B8:C22  | 2.2656 | Unfavorable | Unfavorable Bump                                                | B:DG16:N7  | :B8:C22  |
| B:DA17:N7 - :B8:C29  | 2.2157 | Unfavorable | Unfavorable Bump                                                | B:DA17:N7  | :B8:C29  |
| B:DA18:N7 - :B8:C33  | 2.2604 | Unfavorable | Unfavorable Bump                                                | B:DA18:N7  | :B8:C33  |
| B:DA18:N7 - :B8:H21  | 1.6330 | Unfavorable | Unfavorable Bump                                                | B:DA18:N7  | :B8:H21  |
| B:DA18:N7 - :B8:H22  | 1.3718 | Unfavorable | Unfavorable Bump                                                | B:DA18:N7  | :B8:H22  |
| B:DA18:N6 - :B8:C29  | 2.2730 | Unfavorable | Unfavorable Bump                                                | B:DA18:N6  | :B8:C29  |
| B:DA18:N6 - :B8:C30  | 2.2011 | Unfavorable | Unfavorable Bump                                                | B:DA18:N6  | :B8:C30  |
| B:DA18:H61 - :B8:C29 | 1.5769 | Unfavorable | Unfavorable Bump                                                | B:DA18:H61 | :B8:C29  |
| B:DA18:H61 - :B8:C30 | 1.6737 | Unfavorable | Unfavorable Bump                                                | B:DA18:H61 | :B8:C30  |
